# Supplementary material for: Proteomic and Transcriptomic Analyses to Decipher the Chitinolytic Response of Jeongeupia spp
Source: MDPI journal article supplement (doi:10.3390/md21080448), 2023-08-15
Supplement: s1 [file s1]

## Supplementary Materials

**Table S1:** Signal peptide prediction of the *J. wiesaeckerbachii* chitinolytic machinery with SignalP 6.0., which recognizes conventional Sec, TAT and pilin-like translocons, processed with either of SPI, SPII or SPIII leader peptidases, respectively. GH = glycoside hydrolase family XX. LPMO = Lytic polysaccharide monooxygenase.

| Gene ID        | CAZy classification | Probability | Translocon/leader Peptidase | Cleavage site | Function        |
|----------------|---------------------|-------------|-----------------------------|---------------|-----------------|
| pgaptmp_000366 | GH 18               | 96.8%       | Sec/SPI                     | Pos. 23 - 24  | Chitinase       |
| pgaptmp_000371 | GH 18               | 46.4%       | Sec/SPI                     | Pos. 10 - 11  |                 |
| pgaptmp_000372 | GH 18               | 97.8%       | Sec/SPI                     | Pos. 24 - 25  |                 |
| pgaptmp_000389 | GH 18               | 97.5%       | Sec/SPI                     | Pos. 23 - 24  |                 |
| pgaptmp_000635 | GH 18               | NA          | NA                          | NA            |                 |
| pgaptmp_000836 | GH 18               | 97.2%       | Sec/SPI                     | Pos. 21 -22   |                 |
| pgaptmp_000837 | GH 18               | 97.3%       | Sec/SPI                     | Pos. 23 - 24  |                 |
| pgaptmp_001504 | GH 18               | 94.4%       | Sec/SPI                     | Pos. 24 -25   |                 |
| pgaptmp_001732 | GH 18               | 94.9%       | Sec/SPI                     | Pos. 34 -35   |                 |
| pgaptmp_001841 | GH 18               | 75.9%       | Sec/SPI                     | Pos. 18 - 19  |                 |
| pgaptmp_002137 | GH 18               | 99.4%       | Sec/SPII                    | Pos. 15 - 16  |                 |
| pgaptmp_003083 | GH 18               | 97.6%       | Sec/SPI                     | Pos. 17 -18   |                 |
| pgaptmp_001746 | GH 18               | NA          | NA                          | NA            |                 |
| pgaptmp_000302 | GH 19               | 97.9%       | Sec/SPI                     | Pos. 21 - 22  |                 |
| pgaptmp_000680 | GH 19               | NA          | NA                          | NA            |                 |
| pgaptmp_001077 | GH 19               | 97.6%       | Sec/SPI                     | Pos. 20 - 21  | Hexo-saminidase |
| pgaptmp_000269 | GH 20               | NA          | NA                          | NA            |                 |
| pgaptmp_000306 | GH 20               | NA          | NA                          | NA            |                 |
| pgaptmp_001731 | GH 20               | 97.6%       | Sec/SPI                     | Pos. 20 -21   |                 |
| pgaptmp_000308 | GH 3                | NA          | NA                          | NA            |                 |
| pgaptmp_000872 | GH 3                | NA          | NA                          | NA            |                 |
| pgaptmp_001323 | GH 3                | NA          | NA                          | NA            |                 |
| pgaptmp_000148 | LPMOAA10            | 98%         | Sec/SPI                     | Pos. 22 - 23  | LPMO            |

**Table S2:** Sequencing and mapping metrics per sample.

| Sample | Carbon Source    | Total HQ Reads | Mapped Reads       | Unmapped Reads     | Unique Reads       |
|--------|------------------|----------------|--------------------|--------------------|--------------------|
| 1      | Colloidal Chitin | 21.57M         | 20.11M<br>(93.25%) | 1.46M<br>(6.75%)   | 19.69M<br>(91.28%) |
| 2      | Colloidal Chitin | 18.65M         | 17.80M<br>(95.45%) | 848.81K<br>(4.55%) | 17.37M<br>(93.14%) |
| 3      | Glucose          | 21.70M         | 21.56M<br>(99.33%) | 144.42K<br>(0.67%) | 20.70M<br>(95.37%) |
| 4      | Glucose          | 21.71M         | 21.55M<br>(99.30%) | 152.72K<br>(0.70%) | 20.67M<br>(95.24%) |

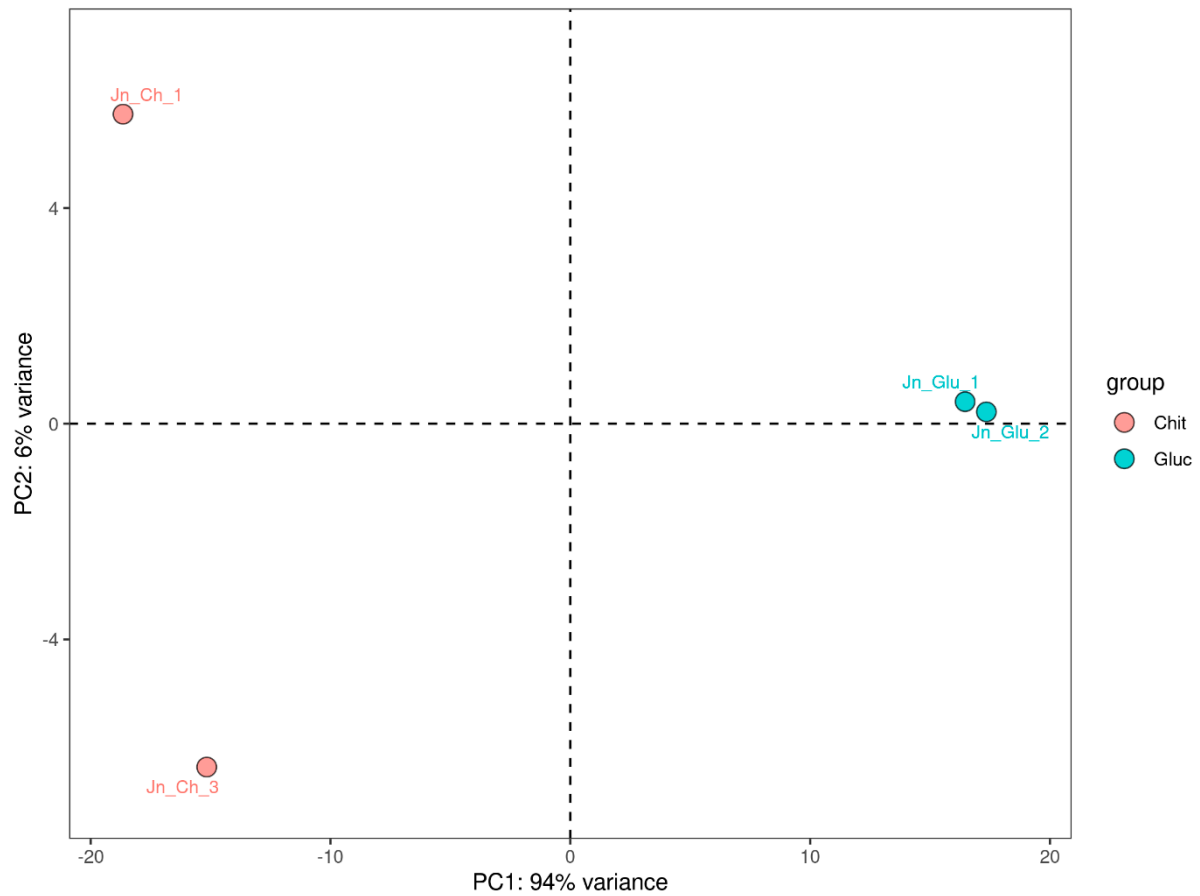

**Figure S1:** Principal Component Analysis (PCA) plot of the differential transcriptomics samples of *Jeongeupia wiesaeckerbachii*. Pink dots represent minimal colloidal chitin media derived transcriptomes, while light blue dots represent minimal glucose media derived transcriptomes. The chitin induced RNA sample 2 had to be omitted due to putative contamination. Therefore, a third sample “Jn-Ch\_3” was sequenced and evaluated.

**Table S3:** Top 5 most variable transcripts of *Jeongeupia wiesaeckerbachii* in minimal media with glucose as exclusive carbon source. Transcripts were sorted according to the five lowest FDR corrected P-values. Additionally, all detected glucosamine metabolism related genes, which were upregulated under glucose media conditions, are listed in the lower half of the table.

| Carbon source | Rank | Adjusted <i>p</i> -value | log2 Fold Change | Gene ID        | Description                                           |
|---------------|------|--------------------------|------------------|----------------|-------------------------------------------------------|
| Glucose       | 1    | $1.96 \times 10^{-47}$   | 4.41             | pgaptmp_000260 | porin                                                 |
|               | 2    | $1.69 \times 10^{-44}$   | 4.31             | pgaptmp_001037 | hypothetical protein                                  |
|               | 3    | $1.88 \times 10^{-41}$   | 5.61             | pgaptmp_001534 | hypothetical protein                                  |
|               | 4    | $3.11 \times 10^{-38}$   | 3.94             | pgaptmp_002986 | hasin family protein                                  |
|               | 5    | $2.02 \times 10^{-30}$   | 3.34             | pgaptmp_000388 | superoxide dismutase [Fe]                             |
| Glucose       | 1334 | $8.50 \times 10^{-4}$    | 0.93             | pgaptmp_001731 | carbohydrate-binding domain-containing protein (GH20) |
|               | 1353 | $9.96 \times 10^{-4}$    | 0.94             | pgaptmp_001323 | beta-N-acetylhexosaminidase (GH3)                     |

|      |                       |      |                |                                                 |
|------|-----------------------|------|----------------|-------------------------------------------------|
| 1512 | $2.89 \times 10^{-3}$ | 0.79 | pgaptmp_001504 | glycosyl hydrolase family 18 protein            |
| 1900 | $2.47 \times 10^{-2}$ | 0.60 | pgaptmp_000440 | sugar ABC transporter permease                  |
| 3390 | $9.32 \times 10^{-1}$ | 0.03 | pgaptmp_000441 | sugar ABC transporter substrate-binding protein |

**Table S4:** Differentially upregulated *J. wiesaeckerbachii* transcripts involved in gene regulation under minimal colloidal chitin growth conditions compared to minimal glucose media derived samples, from highest to lowest log2 fold changes. Chitin-fed *J. wiesaeckerbachii* cells were harvested and RNA subsequently extracted after three days of cultivation, while glucose-induced RNA was extracted after one day of cultivation, in duplicates each.

| Gene ID        | log2 Fold Change | Adjusted <i>p</i> -value | Annotation (PGAP)                                                                                          |
|----------------|------------------|--------------------------|------------------------------------------------------------------------------------------------------------|
| pgaptmp_002681 | 2.53             | $6.24 \times 10^{-22}$   | sigma-70 family RNA polymerase sigma factor                                                                |
| pgaptmp_002797 | 2.41             | $1.12 \times 10^{-9}$    | Rrf2 family transcriptional regulator                                                                      |
| pgaptmp_000237 | 2.21             | $2.66 \times 10^{-12}$   | hypothetical protein (putative TF according to SWISS-MODEL)                                                |
| pgaptmp_000300 | 2.12             | $1.88 \times 10^{-13}$   | anti-sigma factor                                                                                          |
| pgaptmp_002638 | 2.12             | $3.45 \times 10^{-5}$    | GntR family transcriptional regulator                                                                      |
| pgaptmp_000299 | 2.01             | $3.29 \times 10^{-12}$   | sigma-70 family RNA polymerase sigma factor                                                                |
| pgaptmp_001414 | 1.75             | $3.74 \times 10^{-7}$    | LytTR family DNA-binding domain-containing protein                                                         |
| pgaptmp_002188 | 1.65             | $1.63 \times 10^{-10}$   | DeoR/GlpR family DNA-binding transcription regulator                                                       |
| pgaptmp_002870 | 1.64             | $2.44 \times 10^{-10}$   | proline dehydrogenase family protein                                                                       |
| pgaptmp_002388 | 1.64             | $4.80 \times 10^{-9}$    | elongation factor G                                                                                        |
| pgaptmp_001086 | 1.58             | $5.97 \times 10^{-8}$    | methylated-DNA--[protein]-cysteine S-methyltransferase                                                     |
| pgaptmp_000877 | 1.54             | $4.80 \times 10^{-9}$    | sigma-54 dependent transcriptional regulator                                                               |
| pgaptmp_000768 | 1.41             | $6.30 \times 10^{-8}$    | sigma-70 family RNA polymerase sigma factor                                                                |
| pgaptmp_002499 | 1.41             | $4.72 \times 10^{-6}$    | sensor histidine kinase KdpD                                                                               |
| pgaptmp_000768 | 1.35             | $2.87 \times 10^{-7}$    | trifunctional transcriptional regulator/proline dehydrogenase/L-glutamate gamma-semialdehyde dehydrogenase |
| pgaptmp_000895 | 1.23             | $2.05 \times 10^{-6}$    | sigma-54 dependent transcriptional regulator                                                               |
| pgaptmp_002703 | 1.22             | $1.14 \times 10^{-3}$    | metalloregulator ArsR/SmtB family transcription factor                                                     |
| pgaptmp_003366 | 1.21             | $3.92 \times 10^{-2}$    | GntR family transcriptional regulator                                                                      |

**Table S5:** Bioinformatic transcriptomics analysis parameters as performed and provided by Eurofins Genomics.

| Step                      | Tool                                | Parameter                                                                                                                                                                                                                                                                                                                                                                                                               |
|---------------------------|-------------------------------------|-------------------------------------------------------------------------------------------------------------------------------------------------------------------------------------------------------------------------------------------------------------------------------------------------------------------------------------------------------------------------------------------------------------------------|
| Alignment                 | STAR run through Sentieon framework | -twopassMode Basic -alignIntronMax 1-limitBAMsortRAM 300000000000 -outFilterMultimapNmax 20 -outMultimapperOrder Random -outReadsUnmapped None -outSAMmapqUnique 255 -outSAMattributes NH HI AS NM MD XS                                                                                                                                                                                                                |
| Variant Annotation        | GATK                                | -U ALLOW_SEQ_DICT_INCOMPATIBILITY -G StandardAnnotation -G RankSumTest -G WorkInProgressAnnotation -XA MVLikelihoodRatio -A BaseCounts -A AlleleBalance-BySample -A MappingQualityZeroBySample -dt NONE                                                                                                                                                                                                                 |
| Gene pred.                |                                     | default                                                                                                                                                                                                                                                                                                                                                                                                                 |
| rRNA purging              | RiboDetector                        | -e rrna -chunk_size 5000                                                                                                                                                                                                                                                                                                                                                                                                |
| Strand Specificity        | Rseqc                               | default                                                                                                                                                                                                                                                                                                                                                                                                                 |
| Sequence Cleaning         | Seqtk                               | -length_required 80 -qualified_quality_phred 20 -average_qual 20 -detect_adapter_for_pe                                                                                                                                                                                                                                                                                                                                 |
|                           | snpEff                              | -noLog -no-downstream -no-upstream -no-intergenic                                                                                                                                                                                                                                                                                                                                                                       |
| Split Read Junction       | Sentieon                            | -reassign_mapq 255:60                                                                                                                                                                                                                                                                                                                                                                                                   |
| Transcript Quantification | featureCounts                       | -donotsort -p -C -largestOverlap -g ID -t gene -s 2 -T 8 -Q 10                                                                                                                                                                                                                                                                                                                                                          |
| Variant Calling           | Sentieon's HaplotypeCaller          | -call_conf 20 -emit_conf 20 -trim_soft_clip                                                                                                                                                                                                                                                                                                                                                                             |
| Variant Filtration Indel  | GATK's Variant Filtration module    | -filterExpression 'QD < 2.0' -filterName QDFilter -filterExpression 'ReadPos-RankSum < -20.0' -filterName ReadPosFilter -filterExpression 'FS > 200.0' -filterName FSFilter                                                                                                                                                                                                                                             |
| Variant Filtration        | GATK's Variant Filtration module    | -filterExpression 'DP <= 20' -filterName LowCovFilter -filterExpression 'QD < 2.0' -filterName QDFilter -filterExpression 'MQ < 40.0' -filterName MQFilter -filterExpression 'FS > 60.0' -filterName FSFilter -filterExpression 'HaplotypeScore > 13.0' -filterName HaplotypeFilter -filterExpression 'MQRankSum < -12.5' -filterName MQRankSumLow -filterExpression 'ReadPos-RankSum < -8.0' -filterName ReadPosFilter |

**Table S6:** CAZyme prediction of the collective >1.2-fold upregulated proteomic and transcriptomic results of *J. wiesaeckerbachii* with chitin substrate, mediated by dbCAN 3.0. AA = auxiliary activity, CBM = carbohydrate binding module, CE = carbohydrate esterase, GH = glycosyl hydrolase family, GT = glycosyltransferase. The two sequence homology based function prediction tools HMMER and DIAMOND are deployed by dbCAN3.0 with the following parameters: HMMER:dbCAN (E-Value < 10<sup>-15</sup>, coverage > 0.35), DIAMOND: CAZy (E-Value < 10<sup>-102</sup>) HMMER: dbCAN-sub (E-Value < 10<sup>-15</sup>, coverage > 0.35). SignalP predicts prokaryotic signal peptides of the conventional Sec, TAT and pilin-like translocons, processed with either of SPI, SPII or SPIII leader peptidases, respectively.

| Gene ID        | HMMER                       | dbCAN_sub                   | DIAMOND         | SignalP |
|----------------|-----------------------------|-----------------------------|-----------------|---------|
| pgaptmp_000148 | AA10(23-202)                | AA10_e25+CBM5_e79           | AA10+CBM5       | Y(1-23) |
| pgaptmp_000203 | N                           | N                           | CBM12+CBM5      | Y(1-21) |
| pgaptmp_000269 | GH20(299-720)               | GH20_e124                   | GH20            | N       |
| pgaptmp_000302 | GH19(265-520)               | GH19_e2                     | CBM5+GH19       | Y(1-22) |
| pgaptmp_000306 | GH20(306-724)               | GH20_e124                   | GH20            | N       |
| pgaptmp_000366 | CBM5(125-168)+GH18(247-668) | CBM12_e3+CBM5_e51+GH18_e258 | CBM12+CBM5+GH18 | Y(1-24) |
| pgaptmp_000371 | GH18(344-779)               | CBM12_e3+GH18_e326          | CBM12+CBM5+GH18 | N       |
| pgaptmp_000372 | CBM5(114-156)+GH18(218-489) | CBM5_e95+GH18_e14           | CBM12+CBM5+GH18 | Y(1-25) |
| pgaptmp_000389 | GH18(245-670)               | CBM12_e3+CBM5_e51+GH18_e258 | CBM12+CBM5+GH18 | Y(1-24) |
| pgaptmp_000437 | CE4(62-182)                 | CE4_e257                    | CE4             | Y(1-21) |
| pgaptmp_000464 | N                           | N                           | CBM50+GH25      | N       |
| pgaptmp_000470 | CE9(13-380)                 | CE9_e34                     | CE9             | N       |
| pgaptmp_000635 | GH18(9-348)                 | GH18_e233                   | GH18            | N       |
| pgaptmp_000680 | GH19(124-224)               | GH19_e86                    | GH19            | N       |
| pgaptmp_000744 | N                           | N                           | GH13            | N       |
| pgaptmp_000784 | GT4(192-329)                | GT4_e4016                   | GT4             | N       |
| pgaptmp_000836 | CBM5(115-157)+GH18(243-540) | CBM12_e3+CBM5_e51+GH18_e151 | CBM12+CBM5+GH18 | Y(1-22) |
| pgaptmp_000837 | GH18(253-674)               | CBM12_e3+CBM5_e51+GH18_e164 | CBM12+CBM5+GH18 | Y(1-24) |
| pgaptmp_000915 | GT51(59-232)                | GT51_e153                   | GT51            | N       |
| pgaptmp_000961 | N                           | N                           | CBM32           | Y(1-32) |
| pgaptmp_001130 | GH166(30-250)               | GH166_e1                    | GH166           | N       |
| pgaptmp_001135 | GT4(315-471)                | GT4_e324                    | GT4             | N       |
| pgaptmp_001157 | N                           | AA2_e1                      | AA0             | N       |
| pgaptmp_001207 | N                           | N                           | GH6             | N       |
| pgaptmp_001221 | N                           | N                           | GT58            | N       |
| pgaptmp_001255 | N                           | CBM12_e3                    | N               | Y(1-28) |
| pgaptmp_001300 | GT2(85-251)                 | GT2                         | GT2             | N       |
| pgaptmp_001323 | GH3(64-291)                 | GH3_e28                     | GH3             | N       |
| pgaptmp_001349 | GT28(187-345)               | GT28_e46                    | GT28            | N       |
| pgaptmp_001374 | N                           | GH16_e73                    | GH16            | Y(1-24) |
| pgaptmp_001504 | GH18(39-388)                | GH18_e153                   | GH18            | Y(1-23) |
| pgaptmp_001722 | GH23(474-603)               | GH23_e952                   | GH23            | Y(1-19) |
| pgaptmp_001732 | GH18(245-703)               | GH18_e224                   | CBM12+GH18      | Y(1-51) |

|                |                |                 |          |         |
|----------------|----------------|-----------------|----------|---------|
| pgaptmp_001746 | GH18(21-488)   | GH18_e224       | GH18     | N       |
| pgaptmp_001840 | N              | N               | CBM12    | Y(1-21) |
| pgaptmp_001841 | GH18(21-372)   | GH18_e425       | GH18     | Y(1-19) |
| pgaptmp_001842 | N              | N               | GH0      | N       |
| pgaptmp_001849 | GH109(5-188)   | N               | N        | N       |
| pgaptmp_001854 | N              | CBM5_e49        | CBM5     | Y(1-24) |
| pgaptmp_001856 | N              | N               | GT51     | N       |
| pgaptmp_001891 | N              | N               | GT2      | N       |
| pgaptmp_001955 | N              | N               | GH1      | N       |
| pgaptmp_001958 | N              | N               | GH38     | N       |
| pgaptmp_002116 | GT4(176-299)   | GT4_e3056       | GT4      | N       |
| pgaptmp_002133 | CE1(152-377)   | N               | CBM5     | Y(1-27) |
| pgaptmp_002137 | GH18(28-385)   | GH18_e316       | GH18     | Y(1-18) |
| pgaptmp_002139 | N              | N               | GH1      | N       |
| pgaptmp_002189 | N              | N               | GH36     | N       |
| pgaptmp_002212 | CE2(195-406)   | CBM5_e51+CE2_e8 | CBM5+CE2 | Y(1-21) |
| pgaptmp_002223 | N              | N               | GT83     | N       |
| pgaptmp_002276 | N              | N               | GH28     | N       |
| pgaptmp_002558 | GH104(11-156)  | GH104_e0        | N        | N       |
| pgaptmp_002718 | N              | N               | GT1      | N       |
| pgaptmp_002719 | N              | N               | GT1      | N       |
| pgaptmp_002720 | N              | N               | GT1      | N       |
| pgaptmp_002942 | GH5_28(25-366) | GH5_e210        | GH5_28   | N       |
| pgaptmp_002985 | N              | N               | GH13     | N       |
| pgaptmp_002996 | AA7(31-458)    | AA7_e0          | N        | N       |
| pgaptmp_003049 | GH9(102-537)   | GH9_e20         | GH9      | N       |
| pgaptmp_003078 | GH103(32-321)  | GH103_e29       | GH103    | Y(1-21) |
| pgaptmp_003083 | GH18(198-582)  | GH18_e427       | GH18     | Y(1-18) |
| pgaptmp_003133 | N              | CBM50_e508      | CBM50    | Y(1-26) |
| pgaptmp_003160 | N              | N               | GH13_31  | N       |
| pgaptmp_003182 | N              | N               | GT2      | N       |
| pgaptmp_003195 | N              | N               | CE12     | N       |
| pgaptmp_003266 | GH23(302-444)  | GH23_e322       | GH23     | N       |
| pgaptmp_003309 | GH23(334-469)  | GH23_e69        | GH23     | Y(1-32) |
| pgaptmp_003327 | GH102(90-247)  | GH102_e23       | GH102    | N       |
| pgaptmp_003356 | N              | N               | GT2      | N       |
| pgaptmp_003359 | N              | N               | GT2      | N       |
| pgaptmp_003385 | N              | N               | GH13_11  | N       |
| pgaptmp_003521 | N              | N               | CBM50    | Y(1-24) |
| pgaptmp_003548 | N              | N               | GT4      | N       |
| pgaptmp_003567 | N              | CBM50_e665      | N        | N       |
| pgaptmp_003695 | GT4(315-471)   | GT4_e324        | GT4      | N       |

---

# Full length protocol for in-gel tryptic digestion (timsTOF LC/MS-MS sample preparation)

## Day 1:

- Excise gel bands, cut into 1 mm<sup>3</sup> cubes and put into a 1,5 ml sterile micro reaction tube (gel pieces can be stored at -20°C)

### General notes:

- The following steps are all done with an Eppendorf ThermoMixer.
- Please note that keratin pollution must be minimised (lab coat, gloves, bouffant cap, hygiene mask).
- All solutions must be stored in glass bottles (to reduce contamination with organic stuff from plastic) and only be refilled with substance (no dish washer, because of detergents).

### Solvents:

50 mM ABC (0.2 g ammoniumbicarbonate in 50 ml H<sub>2</sub>O<sub>dd</sub> (HPLC grade))

1:1 ACN:ABC (50 mM) (1:1 mixture of acetonitrile and ABC-buffer)

10 mM DTT (3.1 mg dithiothreitol in 2 ml 50 mM ABC)

55 mM IAA (20.3 mg iodoacetamide in 2 ml 50 mM ABC)

5% FA (5 ml formic acid in 95 ml H<sub>2</sub>O<sub>dd</sub> (HPLC grade))

1% FA (diluted 5% FA solution)

25 mM ABC (diluted 50 mM ABC solution)

### 1) Washing procedure:

- Add 100 µl H<sub>2</sub>O<sub>dd</sub>, 15 min, 550 rpm in ThermoMixer
- Remove supernatant
- Add 200 µl 1:1 ACN:ABC (50 mM), 15 min, 550 rpm
- Remove supernatant
- Add 100 µl ACN, 10 min, 550 rpm (shrinking of gel pieces)
- Remove supernatant
- Add 100 µl 50 mM ABC, 5 min, 550 rpm
- Add additional 100 µl ACN, 15 min, 550 rpm
- Remove supernatant
- Add 100 µl ACN, 10 min, 550 rpm
- In the meantime, boot the speed vac to precool the vapour condenser
- Remove supernatant
- Dry gel pieces in speedvac, 20 min, 0 mbar, RT. Gel pieces should not be blue anymore.
- Set ThermoMixer to 56°C

### 2) Reduction, alkylation, washing, digestion:

- Add 100 µl 10 mM DTT, 45 min, 56 °C, 550 rpm. Set temperature to 22 °C/room temperature afterwards.
- Remove supernatant
- Add 100 µl ACN

- Remove supernatant
- Add 100 µl 55 mM IAA, 30 min in the dark (place aluminium foil over shaker lid), RT, 550 rpm
- Remove supernatant
- Add 100 µl ACN:ABC (50 mM), 15 min, 550 rpm
- Remove supernatant
- Repeat this step 2 times, 3 x in total
- Add 100 µl ACN, 10 min, 550 rpm, precool/boot speed vac
- Remove supernatant
- Dry gel pieces in speedvac, 15 min, 0 mbar, RT
- Add 100 µl digest solution (1 µl trypsin solution (-80 °C freezer, 14, thaw on ice) in 100 µl **25 mM** ABC 5 °C), incubate in the fridge for 10 min
- 37 °C, **300 rpm** over night
- (After one hour) make sure that all gel pieces are covered with at least 1 mm digest solution, if not add more 25 mM ABC

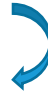

## Day 2:

### 3) extraction of peptides

- Transfer supernatant into a new micro reaction tube. Always collect all supernatants of the following steps in there (1 micro reaction tube per sample)
- Add 100 µl 25 mM ABC to gel pieces, 15 min sonification
- Add additional 100 µl ACN, 15 min
- Transfer supernatant into micro reaction tube
- Add 100 µl 5% FA, 15 min sonification
- Add additional 100 µl ACN, 15 min sonification
- Transfer supernatant into micro reaction tube
- Add 100 µl ACN, 15 min sonification
- Transfer supernatant to micro reaction tube, store gel pieces at -20 °C
- Remove all solvent in speed vac (the time depends on the number of samples, generally about 2.5 h), Peptides can be stored at -80°C

## Day of measurement:

### 4) Preparing Peptides for mass spectrometry

- Dissolve Peptides in 20 µl 1% FA, 10 min sonification
- Preequilibrate centrifugal filters with 20 µl 1% FA (13,3 k, 1 min)
- Discard equilibration solution
- Add Peptide solution to equilibrated filters (13,3 k, 1 min)
- Transfer filtrate to vial
- **Follow the manual of the centrifugal filters for the washing steps**
